# Supplementary material for: The Current Status of Percutaneous Coronary Intervention in Korea: Based on Year 2014 Cohort of Korean Percutaneous Coronary Intervention (K-PCI) Registry
Source: PubMed Central journal article supplement — Korean Circ J. 2017 May 25;47(3):328–40. doi: 10.4070/kcj.2017.0071 (PMC5449527; doi:10.4070/kcj.2017.0071), 2017-05-25
Supplement: kcj-47-328-s001.pdf [file kcj-47-328-s001.pdf]

**Supplementary Table 1.** K-PCI registry 2014 CRF

| Variables                                               | Responses                                                                                                                                                                                                                                                                                                                                                                                  |
|---------------------------------------------------------|--------------------------------------------------------------------------------------------------------------------------------------------------------------------------------------------------------------------------------------------------------------------------------------------------------------------------------------------------------------------------------------------|
| Demographics variables                                  |                                                                                                                                                                                                                                                                                                                                                                                            |
| Institution code-subject No.                            | NNNN-NNNNN                                                                                                                                                                                                                                                                                                                                                                                 |
| Operator code                                           | Numeric                                                                                                                                                                                                                                                                                                                                                                                    |
| Age                                                     | Numeric                                                                                                                                                                                                                                                                                                                                                                                    |
| Risk factors variables                                  |                                                                                                                                                                                                                                                                                                                                                                                            |
| Smoking                                                 | 9. UK, 0. No, 1. Current, 2. Recent (<1 year)                                                                                                                                                                                                                                                                                                                                              |
| Diabetes                                                | 9. UK, 0. No, 1. Yes<br>If yes, check treatment<br>0. None, 1. Diet, 2. Oral med, 3. Insulin                                                                                                                                                                                                                                                                                               |
| Hypertension                                            | 9. UK, 0. No, 1. Yes                                                                                                                                                                                                                                                                                                                                                                       |
| Dyslipidemia                                            | 9. UK, 0. No, 1. Yes                                                                                                                                                                                                                                                                                                                                                                       |
| Family history of premature CAD                         | 9. UK, 0. No, 1. Yes                                                                                                                                                                                                                                                                                                                                                                       |
| Prior MI                                                | 9. UK, 0. No, 1. Yes                                                                                                                                                                                                                                                                                                                                                                       |
| Prior PCI                                               | 9. UK, 0. No, 1. Yes                                                                                                                                                                                                                                                                                                                                                                       |
| Prior CABG                                              | 9. UK, 0. No, 1. Yes                                                                                                                                                                                                                                                                                                                                                                       |
| Renal failure                                           | Check only one category<br>9. UK, 0. No, 1. CKD, 2. ESRD (PD/HD), 3. KT                                                                                                                                                                                                                                                                                                                    |
| Cerebrovascular disease                                 | 9. UK, 0. No, 1. Yes                                                                                                                                                                                                                                                                                                                                                                       |
| Clinical presentation and non-invasive tests variables  |                                                                                                                                                                                                                                                                                                                                                                                            |
| Clinical diagnosis at procedure                         | Check only one category<br>1. Silent ischemia, 2. SA, 3. UA, 4. NSTEMI, 5. STEMI                                                                                                                                                                                                                                                                                                           |
| STEMI PCI                                               | 1. Immediate PCI for STEMI<br>(Within 12 hours from symptom onset)<br>2. PCI for STEMI<br>(Unstable, after 12 hours from symptom onset)<br>3. PCI for STEMI<br>(Stable, after 12 hours from symptom onset)<br>4. PCI for STEMI<br>(Unstable, after successful thrombolysis)<br>5. PCI for STEMI<br>(Stable, after successful thrombolysis)<br>6. Rescue PCI<br>(After failed thrombolysis) |
| Angina classification (within 2 weeks)                  | 0. No symptoms, 1. CCS I, 2. CCS II, 3. CCS III, 4. CCS IV                                                                                                                                                                                                                                                                                                                                 |
| High-risk unstable angina                               | 9. UK, 0. No, 1. Yes<br>Yes, if at least one of the following<br>√ Ongoing or resting chest pain<br>√ Positive cardiac enzyme<br>√ New or worsening pulmonary edema<br>√ New or worsening mitral regurgitation murmur<br>√ Transient ST-segment changes<br>√ New bundle-branch block<br>√ Sustained ventricular tachycardia<br>√ Hypotension                                               |
| Anti-Anginal meds (within 2 weeks) (prior to this cath) | 9. UK, 0. No, 1. Yes<br>If yes, check all that apply<br>√ Beta-blockers: 0. No, 1. Yes<br>√ Ca-channel-blockers: 0. No, 1. Yes<br>√ Long-Acting Nitrates: 0. No, 1. Yes<br>√ Nicorandil: 0. No, 1. Yes<br>√ Trimetazidine: 0. No, 1. Yes<br>√ Others: 0. No, 1. Yes                                                                                                                        |

**Supplementary Table 1.** Continued

| Variables                                | Responses                                                                                                                                                                                                            |
|------------------------------------------|----------------------------------------------------------------------------------------------------------------------------------------------------------------------------------------------------------------------|
| Cardiogenic shock (24h before admission) | 9. UK, 0. No, 1. Yes                                                                                                                                                                                                 |
| Cardiac arrest (24h before admission)    | 9. UK, 0. No, 1. Yes                                                                                                                                                                                                 |
| Treadmill test                           | 0. Not done, 1. Negative, 2. Positive, 9. Undetermined                                                                                                                                                               |
| Stress echo                              | 0. Not done, 1. Negative, 2. Positive, 9. Undetermined                                                                                                                                                               |
| SPECT or thallium scan                   | 0. Not done, 1. Negative, 2. Positive, 9. Undetermined                                                                                                                                                               |
| Stress MR                                | 0. Not done, 1. Negative, 2. Positive, 9. Undetermined                                                                                                                                                               |
| Cardiac CTA                              | 0. Not done, 1. Yes<br>If yes, check result<br>0: No disease<br>1: 1 vessel disease<br>2: 2 vessel diseases<br>3: 3 vessel diseases<br>9: Undetermined                                                               |
| <b>Coronary anatomy variables</b>        |                                                                                                                                                                                                                      |
| Left main                                | 0. No, 1. Yes<br>If yes, check<br>0. 0<50%, 1. 50-69%, 2. ≥70%                                                                                                                                                       |
| Proximal LAD                             | 0. No, 1. Yes<br>If yes, check<br>0. 0<50%, 1. 50-69%, 2. ≥70%                                                                                                                                                       |
| LAD (excluding proximal LAD)             | 0. No, 1. Yes<br>If yes, check<br>0. 0<50%, 1. 50-69%, 2. ≥70%                                                                                                                                                       |
| LCX                                      | 0. No, 1. Yes<br>If yes, check<br>0. 0<50%, 1. 50-69%, 2. ≥70%                                                                                                                                                       |
| RCA                                      | 0. No, 1. Yes<br>If yes, check<br>0. 0<50%, 1. 50-69%, 2. ≥70%                                                                                                                                                       |
| Graft                                    | 0. No, 1. Yes<br>If yes, check<br>0. 0<50%, 1. 50-69%, 2. ≥70%                                                                                                                                                       |
| <b>PCI variables</b>                     |                                                                                                                                                                                                                      |
| PCI date                                 | Date                                                                                                                                                                                                                 |
| PCI status                               | 9. UK, 1. Elective, 2. Urgent, 3. Emergent, 4. Salvage                                                                                                                                                               |
| Arterial access site for PCI             | √ UK: 0. No, 1. Yes<br>√ Femoral: 0. No, 1. Yes<br>√ Radial: 0. No, 1. Yes<br>√ Ulnar: 0. No, 1. Yes<br>√ Brachial: 0. No, 1. Yes<br>√ Others: 0. No, 1. Yes                                                         |
| Target lesion PCI                        | Check all treated lesions<br>√ Left main: 0. No, 1. Yes<br>√ Proximal LAD: 0. No, 1. Yes<br>√ LAD (excluding proximal LAD) : 0. No, 1. Yes<br>√ LCX: 0. No, 1. Yes<br>√ RCA: 0. No, 1. Yes<br>√ Graft: 0. No, 1. Yes |
| BMS number per patients                  | Numeric                                                                                                                                                                                                              |
| DES number per patients                  | Numeric                                                                                                                                                                                                              |
| Balloon site number per patients         | Numeric                                                                                                                                                                                                              |

**Supplementary Table 1.** Continued

| Variables               | Responses                                      |
|-------------------------|------------------------------------------------|
| DEB number per patients | Numeric                                        |
| ISR lesion              | 9. UK, 0. No, 1. Yes                           |
| CTO lesion              | 9. UK, 0. No, 1. Yes                           |
| IVUS                    | 9. UK, 0. No, 1. Yes                           |
| FFR                     | 9. UK, 0. No, 1. Yes                           |
| Mechanical support      | 9. UK, 0. No, 1. Yes                           |
| Pre-PCI LVEF            | √ Not accessed: 0. No, 1. Yes<br>√ (Numeric) % |
| <b>Adverse Events</b>   |                                                |
| Death                   | 9. UK, 0. No, 1. Yes                           |
| Cardiac death           | 9. UK, 0. No, 1. Yes                           |
| Nonfatal MI             | 9. UK, 0. No, 1. Yes                           |
| Stent thrombosis        | 9. UK, 0. No, 1. Yes                           |
| Stroke                  | 9. UK, 0. No, 1. Yes                           |
| Urgent PCI              | 9. UK, 0. No, 1. Yes                           |
| Transfusion             | 9. UK, 0. No, 1. Yes                           |

UK: unknown, CAD: coronary artery disease, MI: myocardial infarction, PCI: percutaneous coronary intervention, CABG: coronary artery bypass graft, CKD: chronic kidney disease, ESRD: end stage renal disease, PD: peritoneal dialysis, HD: hemodialysis, KT: kidney transplantation, SA: stable angina, UA: unstable angina, NSTEMI: non-ST-elevation myocardial infarction, STEMI: ST-elevation myocardial infarction, LAD: left anterior descending, LCX: left circumflex, RCA: right coronary artery, DES: drug-eluting stents, DEB: drug-eluting balloon, CTO: chronic total occlusion, IVUS: intravascular ultrasound, FFR: fractional flow reserve, LVEF: left ventricular ejection fraction, MR: magnetic resonance, CCS: Canadian cardiovascular class, CTA: computed tomography angiography, VD: vessel disease
